# Supplementary material for: Calcium phosphate cements modified with pore expanded SBA-15 materials
Source: Royal Society of Chemistry journal article supplement (doi:10.1039/c2jm31206a), 2012-01-01
Supplement: c2jm31206a.pdf [file c2jm31206a.pdf]

## Supplementary information

**Table S1.** Physical properties of the SBA-15 and ULP SBA-15 materials synthesised in this study: specific surface area (SA), total pore volume ( $V_{PT}$ ) and pore diameter ( $d_{pads}$ ), including the mean of the SA,  $V_{PT}$  and  $d_{pads}$  and standard deviation  $s$  of SA,  $V_{PT}$  and  $d_{pads}$ .

|               | SA (m <sup>2</sup> /g) | $V_{PT}$ (cm <sup>3</sup> /g) | $d_{pads}$ (nm) |
|---------------|------------------------|-------------------------------|-----------------|
| SBA-15-1      | 722                    | 0.77                          | 7.1             |
| SBA-15-2      | 647                    | 0.71                          | 6.9             |
| SBA-15-3      | 626                    | 0.70                          | 6.8             |
| SBA-15-4      | 632                    | 0.64                          | 7.3             |
| SBA-15-5      | 713                    | 0.75                          | 7.0             |
| SBA-15-6      | 746                    | 0.79                          | 7.0             |
| SBA-15-7      | 714                    | 0.83                          | 8.0             |
| SBA-15-8      | 681                    | 0.75                          | 7.3             |
| SBA-15-9      | 708                    | 0.77                          | 6.9             |
| SBA-15-10     | 788                    | 0.97                          | 8.3             |
| SBA-15-11     | 760                    | 0.95                          | 8.0             |
| SBA-15-12     | 783                    | 0.87                          | 7.6             |
| SBA-15-13     | 690                    | 0.82                          | 7.7             |
| <b>Mean</b>   | <b>710</b>             | <b>0.80</b>                   | <b>7.4</b>      |
| <b>s</b>      | <b>55</b>              | <b>0.10</b>                   | <b>0.5</b>      |
| ULP-SBA-15-1  | 640                    | 1.32                          | 24.6            |
| ULP-SBA-15-2  | 722                    | 1.70                          | 20.6            |
| ULP-SBA-15-3  | 619                    | 1.23                          | 19.9            |
| ULP-SBA-15-4  | 652                    | 1.29                          | 22.6            |
| ULP-SBA-15-5  | 689                    | 1.08                          | 19.6            |
| ULP-SBA-15-6  | 720                    | 1.40                          | 20.3            |
| ULP-SBA-15-7  | 643                    | 1.41                          | 20.2            |
| ULP-SBA-15-8  | 561                    | 1.00                          | 18.5            |
| ULP-SBA-15-9  | 571                    | 1.22                          | 19.9            |
| ULP-SBA-15-10 | 630                    | 1.55                          | 24.9            |
| ULP-SBA-15-11 | 749                    | 1.73                          | 21.4            |
| ULP-SBA-15-12 | 635                    | 1.48                          | 24.1            |
| <b>Mean</b>   | <b>657</b>             | <b>1.37</b>                   | <b>21.4</b>     |
| <b>s</b>      | <b>55</b>              | <b>0.23</b>                   | <b>2.1</b>      |
